# Supplementary material
Source: PubMed Central journal article supplement (PMC4697717)
Supplement: ajtr0007-2379-f10.pdf [file ajtr0007-2379-f10.pdf]

## Dspp mutations disrupt mineralization homeostasis

**Supplemental Table 1.** Summary of the output data and mapping work

| Sample  | Total Reads | Clean Reads | Total mapped | Perfect Match | ≤3 bp mismatch | Unique Match | Total Unmapped |
|---------|-------------|-------------|--------------|---------------|----------------|--------------|----------------|
| LV-NC   | 12202594    | 12140360    | 10694941     | 9188184       | 1506757        | 8939389      | 1507653        |
| 0 day   |             | 99.49%      | 87.64%       | 75.30%        | 12.35%         | 73.26%       | 12.36%         |
| LV-NC   | 12312917    | 12252583    | 10882605     | 9439742       | 1442863        | 9205635      | 1430312        |
| 7 day   |             | 99.51%      | 88.38%       | 76.67%        | 11.72%         | 74.76%       | 11.62%         |
| LV-NC   | 12038695    | 11982113    | 10618037     | 9279344       | 1338693        | 8897928      | 1420658        |
| 14 day  |             | 99.53%      | 88.20%       | 77.08%        | 11.12%         | 73.91%       | 11.80%         |
| LV-NC   | 11926887    | 11868445    | 10503777     | 9125167       | 1378610        | 8763231      | 1423110        |
| 21 day  |             | 99.51%      | 88.07%       | 76.51%        | 11.56%         | 73.47%       | 11.93%         |
| LV-DSPP | 11994078    | 11936506    | 10535671     | 9117280       | 1418391        | 8776659      | 1458407        |
| 0 day   |             | 99.52%      | 87.84%       | 76.01%        | 11.83%         | 73.17%       | 12.16%         |
| LV-DSPP | 12079423    | 12019025    | 10574029     | 9134124       | 1439905        | 9049430      | 1505394        |
| 7 day   |             | 99.50%      | 87.54%       | 75.62%        | 11.92%         | 74.92%       | 12.46%         |
| LV-DSPP | 12502670    | 12440156    | 10986895     | 9452467       | 1534428        | 9270682      | 1515775        |
| 14 day  |             | 99.50%      | 87.88%       | 75.60%        | 12.27%         | 74.15%       | 12.12%         |
| LV-DSPP | 11763346    | 11703352    | 10332138     | 8927788       | 1404350        | 8610118      | 1431208        |
| 21 day  |             | 99.49%      | 87.83%       | 75.89%        | 11.945         | 73.19%       | 12.17%         |
| LV-M5   | 12164613    | 12102573    | 10681830     | 9206196       | 1475634        | 8900192      | 1482783        |
| 0 day   |             | 99.49%      | 87.81%       | 75.68%        | 12.13%         | 73.16%       | 12.19%         |
| LV-M5   | 12119421    | 12056400    | 10659628     | 9191095       | 1468533        | 9130573      | 1459793        |
| 7 day   |             | 99.48%      | 87.95%       | 75.84%        | 12.12%         | 75.34%       | 12.05%         |
| LV-M5   | 11806754    | 11742997    | 10383170     | 8928782       | 1454388        | 8731663      | 1423584        |
| 14 day  |             | 99.46%      | 87.94%       | 75.62%        | 12.32%         | 73.95%       | 12.06%         |
| LV-M5   | 11725637    | 11668181    | 10333855     | 8958564       | 1375291        | 8577921      | 1391782        |
| 21 day  |             | 99.51%      | 88.13%       | 76.40%        | 11.73%         | 73.16%       | 11.87%         |

## Dspp mutations disrupt mineralization homeostasis

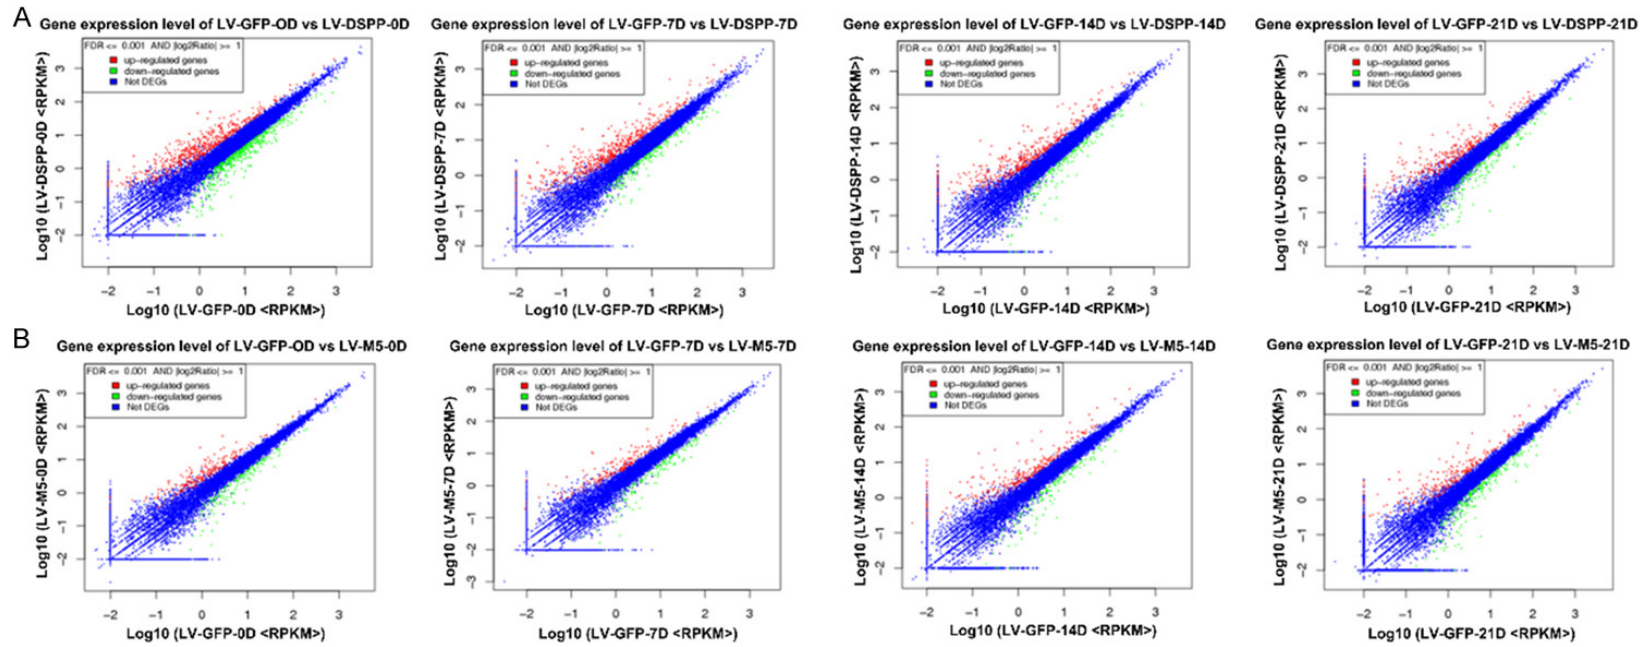

**Supplemental Figure 1.** Differentially-expressed genes (DEGs) in different groups  $P \leq 0.05$ . The red dots represent the up-regulated genes, the green dots indicate the down-regulated genes, and the blue dots show the genes without expression difference between the two samples.
